# Supplementary material for: A simple and effective strategy to enhance the stability and solid–liquid interfacial interaction of an emulsion by the interfacial dilational rheological properties
Source: Royal Society of Chemistry journal article supplement (doi:10.1039/d0sm00638f), 2020-01-01
Supplement: d0sm00638f1.pdf [file d0sm00638f1.pdf]

## Supporting Information

### **A simple and effective strategy to enhance the stability and solid-liquid interfacial interaction of emulsion by the interfacial dilational rheological properties**

Jinmei Lei<sup>1,2,3</sup>, Yuxia Gao<sup>1</sup>, Xu Hou<sup>2-4</sup>, Zhizhi Sheng<sup>2,4,5</sup>, Chenhui Zhang<sup>1\*</sup> and Fengpei Du<sup>1\*</sup>

<sup>1</sup>Department of Chemistry, College of Science, China Agricultural University, Beijing, 100193, P. R. China.

<sup>2</sup>College of Chemistry and Chemical Engineering, Xiamen University, Xiamen 361005, China

<sup>3</sup>State Key Laboratory of Physical Chemistry of Solid Surfaces, Xiamen University, Xiamen 361005, China

<sup>4</sup>Collaborative Innovation Center of Chemistry for Energy Materials, Xiamen University, Xiamen 361005, China

<sup>5</sup>Suzhou Institute of Nano-Tech and Nano-Bionics, Chinese Academy of Sciences, Suzhou 215123, China

## Content

- 1. Dilational rheological properties of emulsifiers with different HLB values** S2
- 2. Stability of emulsions with different HLB values and dilational modulus** S3
- 3. Dilational rheological properties and solid-liquid interaction of emulsion diluents with different HLB values** S4
- 4. Dilational modulus and stability of emulsion with different contents emulsifiers** S5

## 1. Dilational rheological properties of emulsifiers with different HLB values

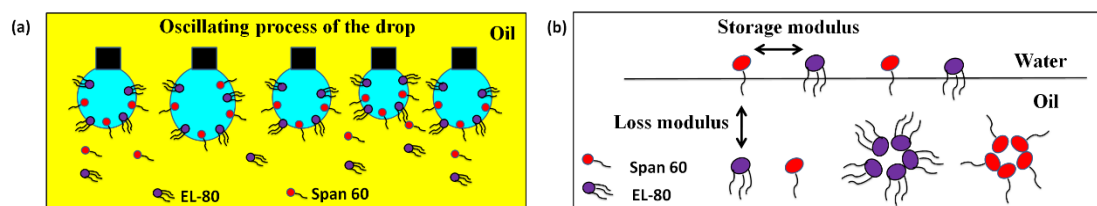

**Fig. S1.** (a) Oscillating process of the drop with changing interfacial area. (b) Schematic of dilational rheological parameters for emulsifiers at the solvent naphtha 150#/water interface.

## 2. Stability of emulsions with different HLB values and dilational modulus

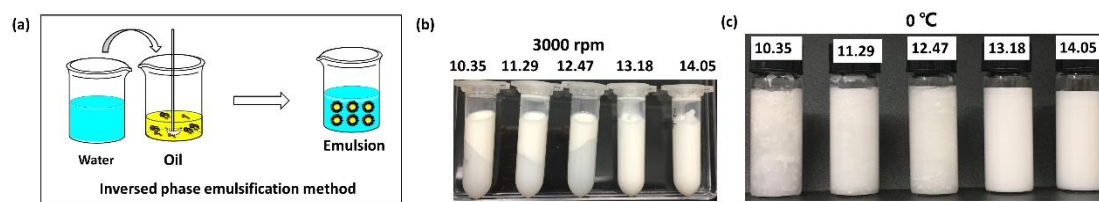

**Fig. S2.** (a) Schematic of the phase inversion emulsification technique. (b) Centrifugal stability at 3000 rpm, and (c) storage stability at 0°C for emulsions prepared with different HLB values (10.35, 11.29, 12.47, 13.18 and 14.05) of EL-80/Span 60.

### 3. Dilational rheological properties and solid-liquid interaction of emulsion diluents with different HLB values

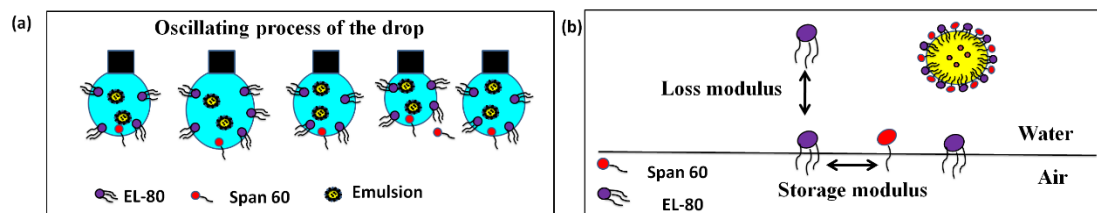

**Fig. S3.** (a) Oscillating process of the drop with changing surface area. (b) Schematic of dilational rheological parameters for emulsions at air/water interface.

#### 4. Dilational modulus and stability of emulsion with different contents emulsifiers

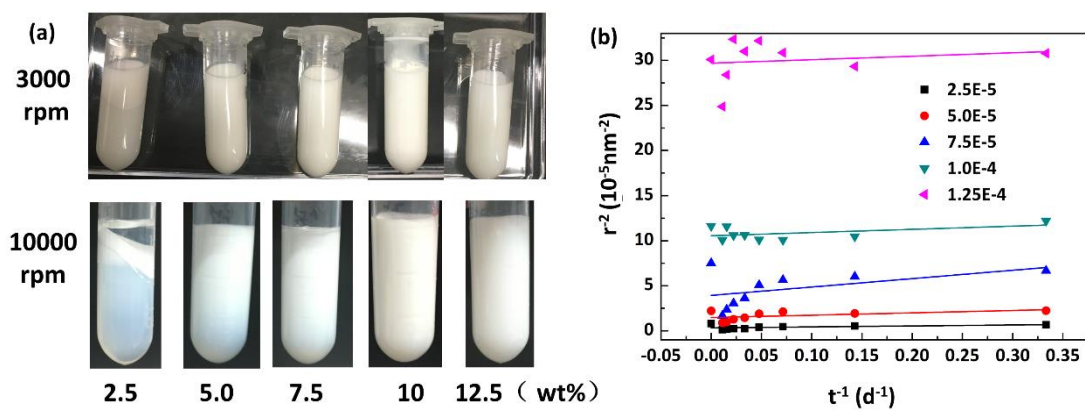

**Fig. S4.** (a) Centrifugal stability at 3000 rpm and 10000 rpm and (b)  $r^2$  as a function of  $t^{-1}$  for emulsions prepared by different weight percent of EL-80/Span 60.
